# Supplementary material
Source: HighWire-hosted journal article supplement (https://bmjopen.bmj.com/content/8/8/e019351)
Supplement: inline-supplementary-material-1 [file inline-supplementary-material-1.pdf]

## **Appendix 1. Interview Schedule**

### **Preamble:**

*Thank you very much for your time today. My name is Liu Xian-Liang and I am completing a Ph.D. from the Australian Catholic University in Australia and Tongji University here in China. I would like to talk with you about how you deliver health education to patients with Acute Coronary Syndrome (ACS) and Type 2 diabetes mellitus (T2DM). We are interested in finding out more about who delivers health education when these patients are admitted to hospital, what is delivered to them, and how it is delivered.*

*The interview will take about half an hour and if at any point you would like to take a break, just let me know.*

*Everything we talk about today will be anonymous. This means that your interview responses will only be shared with research team members and we will ensure that any information we include in our report is not linked to your name.*

*Are you willing to participate in this interview?*

*Although I will take some notes, I would like to record the information so I don't miss anything. Do you give consent for me to record the interview?*

*I have a brief demographic survey to complete. Can we complete this now? We have a content checklist about health education that we will complete during the interview.*

### **Section 1 – Introduction:**

1. Can we start by finding out some information about you?
  - (a) What position do you hold here at the hospital?
  - (b) What are your main responsibilities?

### **Section 2 – Health education**

I would now like to find out about the delivery of health education to patients.

2. What does the term health education mean to you?
3. Can you tell me what kind of health information is provided for patients with ACS and T2DM?
  - (a) And what do you provide? (prompt: can you give me an example?)
  - (b) Introduce the Content Checklist here, and ask the participant to complete – either talking through with you marking off the content; or they complete.
4. Can you tell me what strategies you use to deliver health education to patients?
  - a. What kind of material and which format do you use to provide the material to patients?
5. When and where is health information provided for ACS-T2DM patients?
6. Can you recall when you last delivered an education session to a patient?
  - a. Can you describe the process you used in detail?
  - b. What do you think worked well and what didn't work as well?
7. Do you think that health education is effective and necessary for ACS-T2DM patients?
  - a. Can you tell me why you think this is the case?

b. Are there any specific problems when you give health education for patients with ACS and T2DM?

8. Is there anything else you would like to tell me about delivering health education to ACS-T2DM patients

Thank you very much for your time today.
